# Molecular profiling of metastatic colorectal tumors using next-generation sequencing: a single-institution experience

Jun Gong<sup>1</sup>, May Cho<sup>1</sup>, Marvin Sy<sup>1</sup>, Ravi Salgia<sup>1</sup> and Marwan Fakhri<sup>1</sup>

<sup>1</sup>Department of Medical Oncology, City of Hope National Medical Center, Duarte, CA, USA

Correspondence to: Marwan Fakhri, email: mfakhri@coh.org

Keywords: metastatic colorectal cancer, comprehensive genomic profiling, next-generation sequencing, FoundationOne, retrospective

Received: September 06, 2016

Accepted: January 16, 2017

Published: February 02, 2017

Copyright: Gong et al. This is an open-access article distributed under the terms of the Creative Commons Attribution License 3.0 (CC BY 3.0), which permits unrestricted use, distribution, and reproduction in any medium, provided the original author and source are credited.

## ABSTRACT

**Background:** Recent molecular characterization of colorectal tumors has identified several molecular alterations of interest that are considered targetable in metastatic colorectal cancer (mCRC).

**Methods:** We conducted a single-institution, retrospective study based on comprehensive genomic profiling of tumors from 138 patients with mCRC using next-generation sequencing (NGS) via FoundationOne.

**Results:** Overall, *RAS* mutations were present in 51.4% and *RAF* mutations were seen in 7.2% of mCRC patients. We found a novel *KRAS*<sup>R68S1</sup> mutation associated with an aggressive phenotype. *RAS* amplifications (1.4% *KRAS* and 0.7% *NRAS*), *MET* amplifications (2.2%), *BRAF*<sup>L597R</sup> alterations (0.7%), *ARAF*<sup>S214F</sup> alterations (0.7%), and concurrent *RAS*+*RAF* (1.4%), *BRAF*+*RAF1* (0.7%), and rare *PTEN*-*PIK3CA*-*AKT* pathway mutations were identified and predominantly associated with poor prognosis. *ERBB2* (*HER2*) amplified tumors were identified in 5.1% and all arose from the rectosigmoid colon. Three cases (2.2%) were associated with a hypermutated profile that was corroborated with findings of high tumor mutational burden (TMB): 2 cases with MSI-H and 1 case with a *POLE* mutation.

**Conclusions:** Comprehensive genomic profiling can uncover alterations beyond the well-characterized *RAS*/*RAF* mutations associated with anti-EGFR resistance. *ERBB2* amplified tumors commonly originate from the rectosigmoid colon, are predominantly *RAS*/*BRAF* wild-type, and may predict benefit to *HER2*-directed therapy. Hypermutant tumors or tumors with high TMB correlate with MSI-H status or *POLE* mutations and may predict a benefit from anti-PD-1 therapy.

## INTRODUCTION

Colorectal cancer (CRC) remains the third leading cause of cancer death in both men and women in the United States with an estimated 134,490 new cases and 49,190 deaths in 2016 [1]. Recent advances in the treatment of metastatic CRC (mCRC) have identified improved outcomes with the addition of epidermal growth factor receptor (EGFR)-targeting agents to conventional combination cytotoxic therapy in patients with extended *RAS* wild-type tumors. In contrast, activating mutations in the *RAS* gene (*KRAS* or *NRAS*, present in approximately 50% of

cases of mCRC) and *BRAF* gene (present in about 5% of mCRC patients) have been associated with lack of clinically meaningful benefit or harm when anti-EGFR therapy is employed [2]. The identification of candidates for anti-EGFR therapy through the exclusion of *RAS* and *BRAF* mutations in mCRC serves as a model of selecting optimal therapy based on patient genomic profiles and molecular phenotypes.

Several decades of genomic studies, including the use of more recent next-generation sequencing (NGS), have expedited the search of genetic alterations for potential therapeutic targeting in CRC [3, 4]. Recently, comprehensive molecular characterization of 224 colorectal

tumors was performed by The Cancer Genome Atlas (TCGA) Network [5]. Sixteen percent of colorectal tumors were found to be hypermutated and more commonly found in the right colon with 75% of these cases demonstrating expectedly high microsatellite instability (MSI-H). Twenty-four genes were identified to have significant mutations of interest including *APC*, *SMAD4*, *TP53*, *PIK3CA*, and *KRAS* mutations, as expected. Interestingly, mutations, deletions, or amplifications of the *ERBB* gene family were found in 19% of tumors. In sum, this genomic analysis identified several molecular alterations that are considered targetable, including mediators of dysregulated WNT, RAS, and PI3K pathways such as *ERBB2*, *ERBB3*, *MEK*, *AKT*, *MTOR*, *IGF2*, and *IGFR*.

The recent identification of gene mutations and amplifications of potential significance for therapeutic purposes has led us to investigate the genomic profiles of mCRC patients using NGS (FoundationOne). Here, we describe a single-institution experience in reporting results from comprehensive genomic analysis of tumors from 138 mCRC patients. We aim to characterize genetic alterations present in our study population that have known correlates to prognosis, therapeutic resistance, and potential therapeutic targets in mCRC. In this study, we also report the existence of concurrent gene mutations rarely described in the literature and novel mutations and amplifications that can lead to targeting outside of National Comprehensive Cancer Network (NCCN) standard treatments.

## RESULTS

### Study population

The molecular results from FoundationOne testing of tumors from 138 mCRC patients are summarized in Table 1. The median age of our study group was 56 years (range 27-88) with 59.4% (82) males and 40.6% (56) females. The most common ethnicity was White (85, 61.6%) followed by Asian (29, 21.0%). The most common sites of primary were sigmoid colon (33.3%), rectum (19.6%), and cecum (15.2%). Sixty-eight patients (49.3%) had *KRAS* mutations, 9 patients (6.5%) had *BRAF* mutations, 3 (2.2%) had *NRAS* mutations, 1 (0.7%) had an *ARAF* mutation, 1 (0.7%) had a *RAF-1* mutation, 7 (5.1%) had *ERBB2* amplifications, 25 (18.1%) had *PIK3CA* mutations, 15 (10.9%) had *PTEN* mutations, 4 (2.9%) had *AKT* mutations, and 3 (2.2%) had *MET* amplifications.

### RAS mutations

Overall, *RAS* mutations were present in 51.4% of our mCRC patients, *RAF* mutations were seen in 7.2%, of which *RAS+RAF* concurrent mutations were seen in 1.4%. The remainder (42.8%) were *RAS/RAF* wild type (Figure 1). The most common *RAS* mutations were *KRAS* mutations of exon 2 (codons 12 and 13) including G12D (32.4%), G13D (14.1%), G12V (11.3%), G12S (9.9%), G12C (8.5%), and

G12A (2.8%, Figure 2). Beyond the well-established point mutations in codons 12 and 13 of exon 2 of *KRAS*, we identified mutations in codon 61 of exon 3 (Q61H, 1.4%; Q61K, 1.4%; Q61L, 1.4%), codon 117 of exon 4 (K117N, 1.4%), and codon 146 of exon 4 (A146V, 1.4%; A146V<sup>sub</sup>, 1.4%; A146T, 4.2%). Two mutations (2.8%) in codon 61 (exon 3) of *NRAS* were also detected. Altogether, these non-*KRAS* exon 2 mutations constitute 15.5% of *RAS* mutations.

In our patient population, 2 *KRAS* amplifications (2.8%) and 1 *NRAS* amplification (1.4%) were identified. One patient was a 51-year-old female with *KRAS* amplified rectal cancer with synchronous diffuse metastases (lung and liver). Her best overall response to standard first-line combination chemotherapy (5-fluorouracil (5-FU) and irinotecan or FOLFIRI) plus anti-EGFR therapy (panitumumab) was stable disease (SD) for 6 months. The other patient with *KRAS* amplification was a 51-year-old male diagnosed with right-sided colon cancer and synchronous metastases to the liver and peritoneum who had rapid progression on first- and second-line non-anti-EGFR based therapies. Our 74-year-old male patient with *NRAS* amplification presented with poorly differentiated rectosigmoid adenocarcinoma and synchronous diffuse metastases (liver, mesentery, and bones) and experienced progressive disease (PD) at 2 months on second-line FOLFIRI + cetuximab. Notably, a novel *KRAS*<sup>R68S1</sup> alteration (Figure 2) was identified in a 41-year-old female (1.4%) with rectal cancer and synchronous metastases to the liver and retroperitoneal and supraclavicular lymph nodes who experienced PD at 2 months on anti-EGFR therapy with second-line irinotecan + cetuximab.

### RAF mutations

A total of 11 *RAF* mutations (1 concurrent *BRAF+RAF1* mutation) were found in 7.2% of our patients (Figure 3). Of these, *BRAF*<sup>V600E</sup> activating mutations (exon 15) were the most common single mutations present (40.0%). One activating *BRAF*<sup>L597R</sup> alteration (exon 15) was identified (10.0%) in a 56-year-old male with bulky rectal adenocarcinoma with synchronous metastases that progressed through 9 months of first-line anti-EGFR therapy. One activating *ARAF*<sup>S214F</sup> alteration was also identified (10.0%) in our series of *RAF* mutations. This 60-year-old male patient developed multiple recurrences of rectal adenocarcinoma including, most recently, metastatic disease to the lung treated with neoadjuvant 5-FU, oxaliplatin, and irinotecan (FOLFOXIRI) followed by metastatectomy; he remains in clinical remission. A dual *BRAF*<sup>V600E+KRAS</sup><sup>A164V<sup>sub</sup></sup> alteration was present (10.0%) in an elderly male (age 72) with poorly differentiated right-sided colon cancer with synchronous metastases on first-line systemic combination therapy without anti-EGFR agents. Here an oncogenic *RAS* alteration was paired with a known activating *BRAF* mutation.

Deactivating mutations in *BRAF*<sup>D594G</sup> (10.0%), *BRAF*<sup>G466V</sup> concurrent with *KRAS*<sup>G12S</sup> (10.0%), and

**Table 1: Demographics/patient characteristics**

| Characteristic (n = 138)   | Frequency (%)                |
|----------------------------|------------------------------|
| Age (at initial diagnosis) | Median (range)<br>56 (27-88) |
| Sex                        |                              |
| Male                       | 82 (59.4%)                   |
| Female                     | 56 (40.6%)                   |
| Ethnicity                  |                              |
| White                      | 85 (61.6%)                   |
| Asian                      | 29 (21.0%)                   |
| Black                      | 7 (5.1%)                     |
| Other                      | 3 (2.2%)                     |
| Unknown                    | 14 (10.1%)                   |
| Primary disease site       |                              |
| Sigmoid colon              | 46 (33.3%)                   |
| Rectal                     | 27 (19.6%)                   |
| Cecum                      | 21 (15.2%)                   |
| Rectosigmoid               | 13 (9.4%)                    |
| Colon NOS                  | 31 (22.5%)                   |
| Stage (at diagnosis)       |                              |
| II                         | 5 (3.6%)                     |
| III                        | 16 (11.6%)                   |
| IV                         | 117 (84.8%)                  |
| Relapsed disease           |                              |
| Yes                        | 52 (37.7%)                   |
| No                         | 86 (62.3%)                   |
| KRAS alterations           | 68 (49.3%)                   |
| G12D                       | 23 (16.7%)                   |
| G13D                       | 10 (7.2%)                    |
| G12V                       | 8 (5.8%)                     |
| G12S                       | 7 (5.1%)                     |
| G12C                       | 6 (4.3%)                     |
| A146T                      | 3 (2.2%)                     |
| G12A                       | 2 (1.4%)                     |
| Amplification              | 2 (1.4%)                     |
| Q61H                       | 1 (0.7%)                     |
| Q61K                       | 1 (0.7%)                     |
| Q61L                       | 1 (0.7%)                     |
| K117N                      | 1 (0.7%)                     |

*(Continued)*

| Characteristic (n = 138)                           | Frequency (%)           |
|----------------------------------------------------|-------------------------|
| R68S                                               | 1 (0.7%)                |
| A146V                                              | 1 (0.7%)                |
| A146V <sup>sub</sup>                               | 1 (0.7%)                |
| BRAF alterations                                   | 9 (6.5%)                |
| V600E                                              | 5 (3.6%)                |
| D594G                                              | 1 (0.7%)                |
| G466V                                              | 1 (0.7%)                |
| G469E                                              | 1 (0.7%)                |
| L597R                                              | 1 (0.7%)                |
| NRAS alterations                                   |                         |
| Q61K                                               | 2 (1.4%)                |
| Amplification                                      | 1 (0.7%)                |
| ARAF mutation                                      |                         |
| S214F                                              | 1 (0.7%)                |
| RAF1 mutation                                      |                         |
| S257L                                              | 1 (0.7%)                |
| ERBB2 alterations                                  |                         |
| Amplification                                      | 7 (5.1%)                |
| MET alterations                                    |                         |
| Amplification                                      | 3 (2.2%)                |
| AKT1/AKT2 mutations                                |                         |
| AKT1                                               | 3 (2.2%)                |
| AKT2                                               | 1 (0.7%)                |
| Total number of clinically significant alterations | Median (range) 5 (1-25) |
| MSI                                                |                         |
| MSS                                                | 121 (87.7%)             |
| MSI-L                                              | 0 (0.0%)                |
| MSI-H                                              | 2 (1.4%)                |
| Unknown/not reported                               | 15 (10.9%)              |

NOS: Not otherwise specified; MSI: Microsatellite instability; MSS: Microsatellite stable; MSI-L: MSI low; MSI-H: MSI high.

*BRAF*<sup>G469E</sup> concurrent with *RAF1*<sup>S257L</sup> (10.0%) were also identified. Our patient with a deactivating *BRAF*<sup>D594G</sup> mutation was a 59-year-old male with moderately-poorly differentiated right-sided colon cancer with diffuse metastases that was refractory to all standard of care chemotherapy, including FOLFIRI + cetuximab, and ultimately died from progressive disease. Interestingly, he was noted to have a concurrent *MET* amplification. The patient with a deactivating *BRAF*<sup>G466V</sup> mutation concurrent with an activating *KRAS*<sup>G12S</sup>

mutation was a 51-year-old male with right-sided colon cancer with diffuse metastases that progressed with carcinomatosis while on FOLFOX and immediately following salvage debulking surgery with hyperthermic chemotherapy. Notably, he currently has achieved ongoing partial response (PR) on third-line FOLFIRI and bevacizumab (41+ cycles). Our 66-year-old female with dual deactivating *BRAF*<sup>G469E</sup> and activating *RAF1*<sup>S257L</sup> mutation presented with a right colon cancer with synchronous metastases to bone, liver, lung, and

peritoneum. Her disease was refractory to FOLFOX + bevacizumab and is currently on second-line FOLFIRI + bevacizumab with a clinical benefit.

### ERBB2 amplifications

Seven patients (5.1%) were found to have *ERBB2* amplified tumors with one having a concurrent *KRAS*<sup>G12D</sup> mutation (Figure 4). The majority of these tumors were MSS (87.5%) with *HER2* copy numbers that ranged from 9-190 (Table 2). Notably, all *ERBB2* amplified tumors were located in the rectosigmoid colon as its primary disease site. Four patients with *RAS* wild-type *ERBB2* amplification received anti-EGFR therapy, 3 experienced SD  $\geq$  4 months (2 first-line and 1 second-line) and 1 (second-line) experienced a PR lasting for 5 months as their best overall response to anti-EGFR therapy. The concurrent *ERBB2* amplified and *KRAS*<sup>G12D</sup> mutated tumor was found in a 58-year-old male with moderately differentiated rectal adenocarcinoma with synchronous solitary liver metastasis treated with neoadjuvant 5-FU, oxaliplatin (FOLFOX) followed by hepatic resection and resection of primary – he is currently under surveillance and without evidence of disease.

### AKT1/2 mutations

Three patients (2.2%) had *AKT1*<sup>E17K</sup> mutations while 1 patient (0.7%) had an *AKT2*<sup>E17K</sup> mutation (Table 3). Of these, a majority had concurrent mutations (75%) and tumors located in the right colon (75%). One *AKT1*<sup>E17K</sup> mutated tumor was found to have concurrent *BRAF*<sup>V600E</sup> + *KRAS*<sup>A164V</sup> alterations with phenotype described above. One *AKT1*<sup>E17K</sup> mutated tumor had concurrent alterations in *KRAS*<sup>A146T</sup> + *PIK3CA*<sup>G106V</sup> and was found in a 61-year-old male with initial right-sided colon cancer that recurred with metastases to the liver showing moderately differentiated colon adenocarcinoma. His tumor was characterized by aggressive features, including metastatic disease recurrence following a diagnosis of stage I disease, and development of bony metastases within the first year of recurrence. A concurrent *AKT2*<sup>E17K</sup> + *KRAS*<sup>G12C</sup> altered tumor was found in a 57-year-old female with originally moderately differentiated sigmoid adenocarcinoma that was resected but recurred with metastases to the retroperitoneal lymph nodes currently on first-line FOLFIRI + bevacizumab.

### PIK3CA and PTEN mutations

In total, we identified 25 patients (18.1%) with *PIK3CA* alterations in our cohort (Table 4). The most

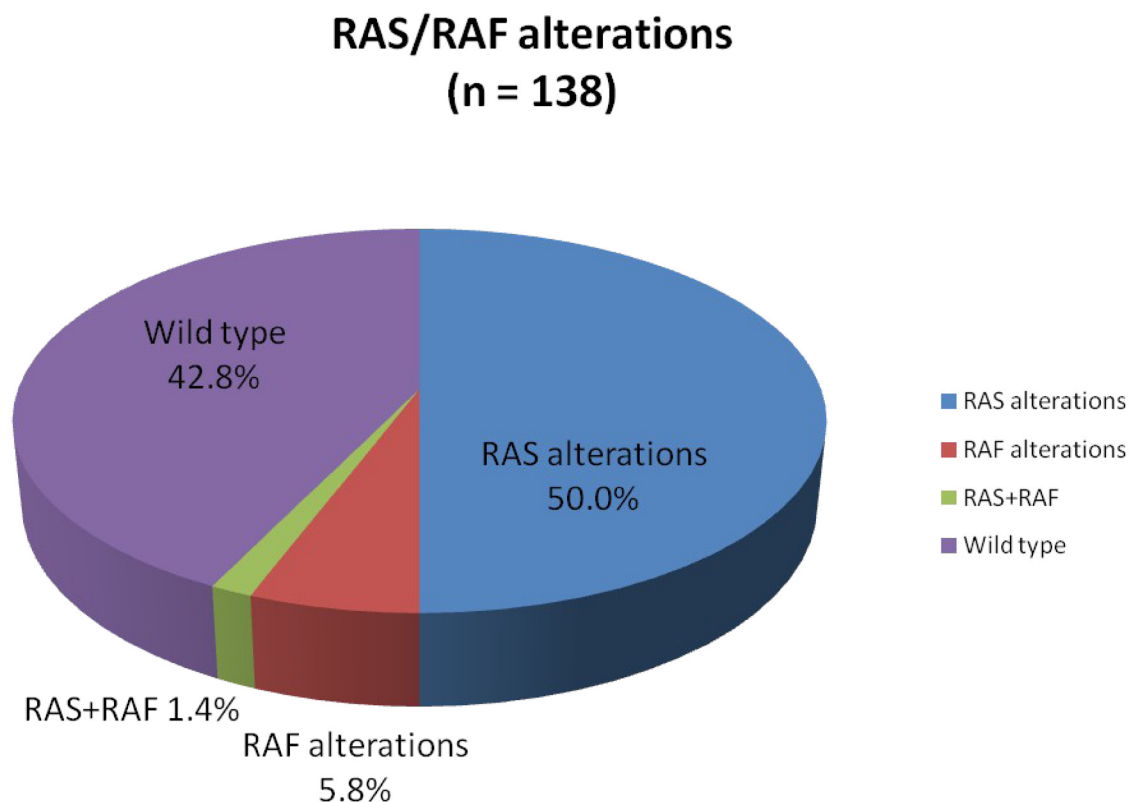

**Figure 1: Proportion of RAS, RAF, RAS+RAF mutations, and RAS/RAF wild type status identified by comprehensive genomic profiling. RAS+RAF mutations are not included in RAS or RAF percentages.**

common primary disease sites included cecum (36.0%), sigmoid colon (12.0%), and rectum (12.0%). Notably, right-sided colon cancers comprised nearly half (48.0%) of tumors with *PIK3CA* alterations. The most commonly identified variants were E545K (24.0%, exon 9), E542K (12.0% exon 9), E110del (8.0%), and Q546K (8.0%). Tumors with *PIK3CA* alterations frequently had concurrent mutations in the RAS-RAF-MAPK signaling pathway. A majority (19 or 76.0%) had concurrent mutations in *KRAS* (G12D 36.0%, G12S 12.0%, G13D 8.0%, and A146T 8.0%). Two patients (8.0%) with *PIK3CA* tumors were found to have concurrent deactivating *BRAF* mutations (G466V and G469E). Notably, these 2 patients had additional alterations in *KRAS*<sup>G12S</sup> and *RAF1*<sup>S257L</sup>, respectively, with phenotypes described above. We also identified additional alterations in the PTEN-PIK3CA-AKT signaling pathway in our group of *PIK3CA* altered tumors (Figure 5). Five patients (20.0%) with *PIK3CA* altered tumors also had *PTEN* mutations, while 1 patient (4.0%) had a dual *PIK3CA* and *AKT1* mutated tumor. Of note, 1 female patient (age 55) with a dual *PIK3CA* and *PTEN* mutation had a rectal tumor demonstrating MSI-H and developed a solitary liver metastasis that has since been resected and treated with adjuvant FOLFOX – she is currently in remission.

### MET amplifications

Three patients (2.2%) in our series had *MET* amplifications (Table 5). Two-thirds of these tumors

were MSS, located in the right colon, and associated with concurrent mutations in *RAS* or *RAF* genes. One 67-year-old male was initially diagnosed with right-sided colon cancer (*KRAS*<sup>G13D</sup>+*MET* alterations present) and synchronous liver metastases. His course has been punctuated by recurrent metastases to the liver and lungs despite several systemic and regional therapies. Another right-sided colon cancer was identified with both a deactivating *BRAF*<sup>D594G</sup> mutation and *MET* amplification with aggressive phenotype described above. A third patient was a 27-year-old male with primary rectal adenocarcinoma that recurred with metastases to the liver and retroperitoneal lymph nodes and refractory to capecitabine + irinotecan + cetuximab. In particular, 2 of 3 patients with *MET* amplifications and *RAS/BRAF*<sup>V600E</sup> wild-type tumors were refractory to anti-EGFR-based therapies.

### Hypermutant status

The majority of our 138 patients with mCRC had tumors with <9 clinically significant alterations (121 or 87.7%) as described by FoundationOne reports (Table 6). The majority of these tumors were located in the left colon and all were MSS. Fourteen patients (10.1%) had 9-16 total alterations while only 3 patients (2.2%) were allocated to the highest number of clinically significant alterations category (17-25). Notably, 2 patients with MSI-H tumors were identified in the highest number of alterations group. One 55-year-old female patient was found to have a dual *PIK3CA* and *PTEN* mutated rectal tumor with phenotype

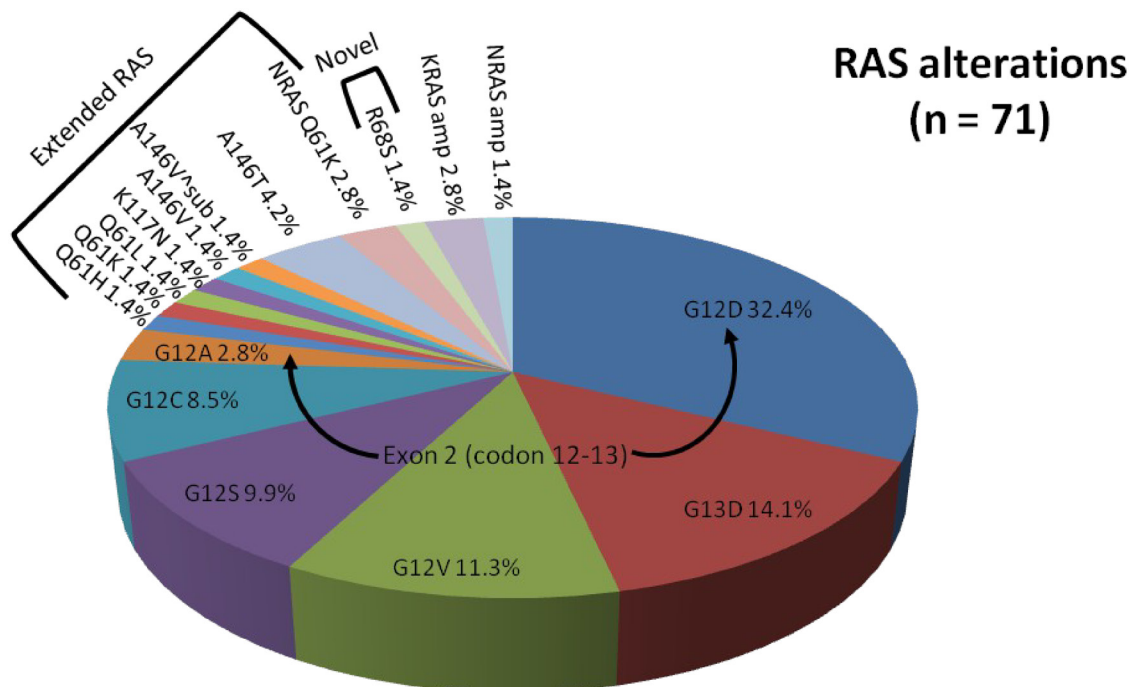

**Figure 2: Proportion of RAS alterations identified by comprehensive genomic profiling.** Arrows denote common mutations of exon 2 (codon 12-13). Brackets denote panel of extended RAS mutations or novel RAS mutation.

described previously. Tumor mutational burden (TMB) from FoundationOne report showed a high TMB of 33 mutations per megabase (Mb). The other was a 47-year-old female with *KRAS*<sup>G12V</sup> mutated metastatic rectal cancer that has progressed through 3 lines of systemic therapy and currently on anti-PD-1 therapy with pembrolizumab with a clinical response. Again, TMB corroborated her findings of a relatively hypermutated tumor with a TMB of 31 mutations/Mb. The third patient with a hypermutant FoundationOne profile had a MSS tumor with an

associated *POLE*<sup>V411L</sup> mutation. Interestingly, this patient was elderly (age 80), had a right colon tumor, and had a recurrence pattern consistent with locoregional recurrence. This patient demonstrated a TMB of 122 mutations/Mb, which was the highest among the cohort.

## DISCUSSION

Comprehensive molecular characterization of 138 tumors from patients with mCRC was performed via NGS

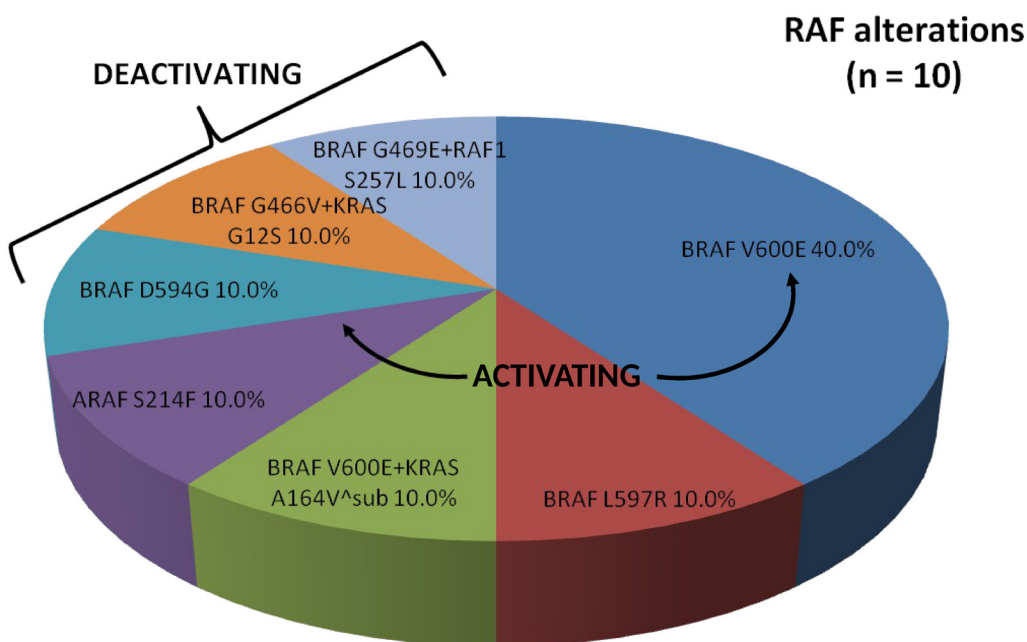

**Figure 3: Proportion of RAF alterations identified by comprehensive genomic profiling.** Arrows denote known activating mutations. Brackets denote known deactivating mutations.

## ERBB2 amplifications (n = 7)

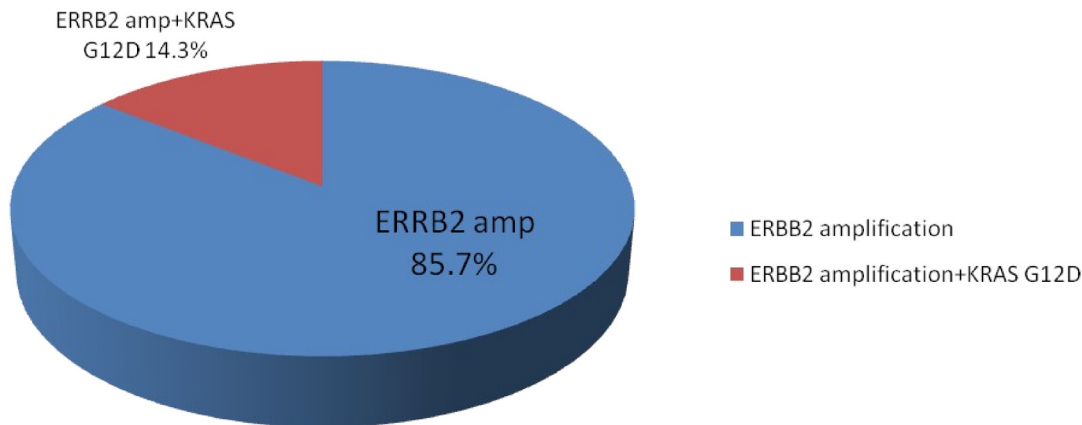

**Figure 4: Proportion of ERBB2 amplifications identified by comprehensive genomic profiling.**

**Table 2: Subset of ERBB2 amplifications**

| Copy number | Dual mutations | Age | Race/sex         | Primary disease site | Lines of systemic therapy | Best overall response to anti-EGFR | MSI |
|-------------|----------------|-----|------------------|----------------------|---------------------------|------------------------------------|-----|
| 9           |                | 55  | Latino/M         | Rectum               | 2                         | SD (4 mo)                          | NR  |
| 12          |                | 88  | Middle Eastern/M | Sigmoid              | 1                         |                                    | MSS |
| 37          |                | 50  | White/F          | Rectum               | 2                         |                                    | MSS |
| 77          | KRAS G12D      | 58  | White/M          | Rectum               | 2                         |                                    | MSS |
| 93          |                | 60  | White/M          | Rectosigmoid         | 2                         | PR (5 mo)                          | MSS |
| 189         |                | 48  | White/M          | Sigmoid              | 4                         | SD (4 mo)                          | MSS |
| 190         |                | 71  | Asian/M          | Sigmoid              | 2                         | SD (5 mo)                          | MSS |

EGFR: Epidermal growth factor receptor; MSI: Microsatellite instability; SD: Stable disease; NR: Not reported; MSS: Microsatellite stable; PR: Partial response.

**Table 3: Subset of AKT1/2 mutations**

| Variant     | Dual mutations*                      | Age | Race/sex | Primary disease site | Lines of systemic therapy | MSI |
|-------------|--------------------------------------|-----|----------|----------------------|---------------------------|-----|
| E17K (AKT1) | KRAS A146T                           | 61  | Black/M  | Right colon, NOS     | 2                         | NR  |
| E17K (AKT1) | BRAF V600E, KRAS A146 <sup>sub</sup> | 72  | White/M  | Ascending colon      | 1                         | MSS |
| E17K (AKT1) |                                      | 69  | White/F  | Ascending colon      | 1                         | MSS |
| E17K (AKT2) | KRAS G12C                            | 57  | Asian/F  | Sigmoid              | 1                         | MSS |

\*For concurrent *RAS* and *BRAF* mutations only, NOS: Not otherwise specified; MSI: Microsatellite instability; NR: Not reported; MSS: Microsatellite stable.

(FoundationOne) in this single-institution retrospective study. Overall, 51.4% and 7.2% of our patients with mCRC were shown to carry *RAS* and *RAF* mutations, respectively, which is concordant with frequencies historically reported in mCRC [2]. The majority of our *RAS* mutations were *KRAS* mutations of exon 2 (codons 12 and 13), which represent those identified in initial phase III trials that predicted lack of benefit from anti-EGFR therapy in mCRC [6, 7]. We also found that 15.5% of all *RAS* mutations in our population comprised a panel of extended *RAS* mutations. This is also consistent with recent data from the PRIME and CRYSTAL clinical trials, where exon 3 and 4 *KRAS* and exons 2, 3, and 4 *NRAS* mutations reflected 14-17% of *RAS* mutations [8, 9]. Identifying these rare *RAS* mutations has major clinical significance, given their association with anti-EGFR resistance [10].

Notably, we identified 2 *KRAS* amplifications and 1 *NRAS* amplification that are extremely rare and poorly characterized. These were found in 3 patients with diffusely metastatic CRC progressive through several lines of systemic therapy including anti-EGFR therapy.

Putative high-level amplifications of *NRAS* were observed in <1% of cases in TCGA dataset though its significance in CRC remains poorly described [5]. *KRAS* amplifications have been associated with acquired resistance to EGFR inhibitors cetuximab or panitumumab in CRC preclinical models [11]. To our knowledge, we are the first to report a novel *KRAS*<sup>R68S1</sup> alteration that was associated with a particularly aggressive phenotype and PD at 2 months on anti-EGFR therapy with cetuximab.

The majority of *RAF* mutations found in our population were *BRAF*<sup>V600E</sup> activating mutations (exon 15), which have been historically associated with poorer survival, resistance to chemotherapy, and lack of clinical benefit with anti-EGFR therapy in mCRC [12–15]. We also identified a lone *BRAF*<sup>L597R</sup> alteration (exon 15), which is poorly described in CRC but has been shown to similarly activate RAF-MEK-ERK signaling in melanoma *in vitro* [16]. Of note, this patient received 9 months of first-line anti-EGFR therapy though our sample size of 1 precludes any meaningful generalizations. One *ARAF*<sup>S214F</sup> alteration was also identified in a patient whose course has been characterized by multiple recurrences of rectal



**Table 4: Subset of PIK3CA alterations**

| Characteristic (n = 25)                    | Frequency (%)             |
|--------------------------------------------|---------------------------|
| Age (at initial diagnosis)                 | Median (range) 55 (30-81) |
| Sex                                        |                           |
| Male                                       | 14 (56.0%)                |
| Female                                     | 11 (44.0%)                |
| Ethnicity                                  |                           |
| White                                      | 17 (68.0%)                |
| Asian                                      | 2 (8.0%)                  |
| Black                                      | 2 (8.0%)                  |
| Other/unknown                              | 4 (16.0%)                 |
| Primary disease site                       |                           |
| Right colon                                | 12 (48.0%)                |
| Transverse colon                           | 2 (8.0%)                  |
| Left colon (includes sigmoid)              | 8 (32.0%)                 |
| Rectum                                     | 3 (12.0%)                 |
| Variant                                    |                           |
| E545K (exon 9)                             | 6 (24.0%)                 |
| E542K (exon 9)                             | 3 (12.0%)                 |
| E110del                                    | 2 (8.0%)                  |
| Q546K                                      | 2 (8.0%)                  |
| C901F                                      | 1 (4.0%)                  |
| C420R                                      | 1 (4.0%)                  |
| C420R+E726K                                | 1 (4.0%)                  |
| E545G <sup>sub</sup> +R108H <sup>sub</sup> | 1 (4.0%)                  |
| G106V                                      | 1 (4.0%)                  |
| H1047L (exon 20)                           | 1 (4.0%)                  |
| H1047Y (exon 20)                           | 1 (4.0%)                  |
| N107del                                    | 1 (4.0%)                  |
| N345K                                      | 1 (4.0%)                  |
| P104L                                      | 1 (4.0%)                  |
| P104_V105del                               | 1 (4.0%)                  |
| R88Q                                       | 1 (4.0%)                  |
| Concurrent KRAS mutations                  | 19 (76.0%)                |
| G12D                                       | 9 (36.0%)                 |
| G12S                                       | 3 (12.0%)                 |
| G13D                                       | 2 (8.0%)                  |

*(Continued)*

| Characteristic (n = 25)      | Frequency (%) |
|------------------------------|---------------|
| A146T                        | 2 (8.0%)      |
| G12V                         | 1 (4.0%)      |
| G12C                         | 1 (4.0%)      |
| A146V                        | 1 (4.0%)      |
| Concurrent PTEN mutations    | 5 (20.0%)     |
| H93Y <sup>sub</sup>          | 1 (4.0%)      |
| L316fs*7                     | 1 (4.0%)      |
| L57fs*6+N323fs*2             | 1 (4.0%)      |
| R130Q+R142W                  | 1 (4.0%)      |
| Splice site 1008_1026+5del24 | 1 (4.0%)      |
| Concurrent BRAF mutations    |               |
| G466V                        | 1 (4.0%)      |
| G469E                        | 1 (4.0%)      |
| Concurrent AKT1 mutation     |               |
| E17K                         | 1 (4.0%)      |
| MSI                          |               |
| MSS                          | 21 (84.0%)    |
| MSI-L                        | 0 (0.0%)      |
| MSI-H                        | 1 (4.0%)      |
| Unknown/Not reported         | 3 (12.0%)     |

MSI: Microsatellite instability; MSS: Microsatellite stable; MSI-L: MSI low; MSI-H: MSI high.

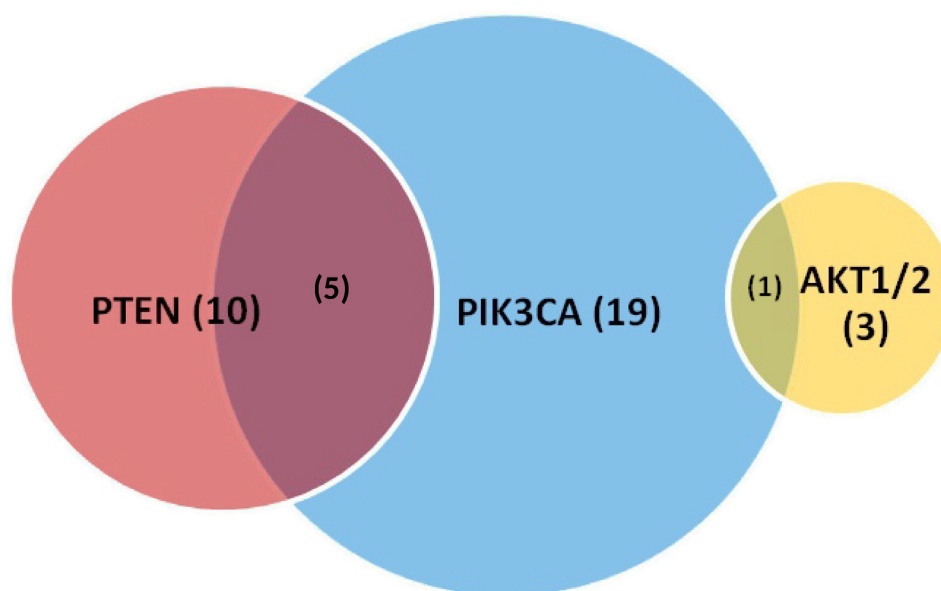

**Figure 5: Proportion of PIK3CA, PTEN, AKT1/2 mutations identified by comprehensive genomic profiling with overlap.** Values in parentheses represent numbers and not percentages.

**Table 5: Subset of MET amplifications**

| Variant | Dual Mutations* | Age | Race/<br>Sex | Smoker | Primary disease<br>site | Lines of systemic<br>therapy | MSI |
|---------|-----------------|-----|--------------|--------|-------------------------|------------------------------|-----|
| MET     | BRAF D594G      | 59  | Asian/M      | Yes    | Right colon, NOS        | 4                            | MSS |
| MET     |                 | 27  | White/M      | Yes    | Rectum                  | 2                            | NR  |
| MET     | KRAS G13D       | 67  | Asian/M      | No     | Ascending colon         | 1                            | MSS |

\*For concurrent *RAS* and *BRAF* mutations only, MSI: Microsatellite instability; NOS: Not otherwise specified; NR: Not reported; MSS: Microsatellite stable.

cancer. Mutations in *ARAF* have been linked as oncogenic drivers in lung adenocarcinoma, and are exceedingly rare in CRC and comprise approximately 2% of cases in the CRC dataset from TCGA [5, 17]. Treatment with the oral RAF inhibitor, sorafenib, has demonstrated prolonged response in a case of refractory non-small-cell lung cancer and rapid responses in patients with refractory histiocytic neoplasms bearing somatic *ARAF* mutations [17, 18].

Despite a previous conception that *KRAS* and *BRAF* mutations are mutually exclusive, we found 1 dual *BRAF*<sup>V600E</sup>+*KRAS*<sup>A164V</sup> mutated tumor that, in our case, was associated with poor prognostic features [19]. One case of concurrent *BRAF*<sup>G466V</sup>+*KRAS*<sup>G12S</sup> mutation and one patient with a concurrent *BRAF*<sup>G469E</sup>+*RAF1*<sup>S257L</sup> mutation were present in our cohort. *BRAF* mutants G466V and G469E have been shown to represent variants with impaired or complete loss of kinase activity *in vitro* [20, 21]. Nevertheless, it has been shown that tumorigenesis is promoted in the presence of deactivating *BRAF* mutations through oncogenic *RAS* mutation and/or CRAF (or RAF-1) signaling [21, 22]. In our study, one deactivating *BRAF*<sup>G466V</sup> mutation was paired with an oncogenic *KRAS*<sup>G12S</sup> mutation, and one deactivating *BRAF*<sup>G469E</sup> mutation was paired with an oncogenic *RAF1*<sup>S257L</sup> alteration, supporting the notion of an evolutionary adaptation in the cancer genome to overcome *BRAF* mutations with impaired function. In both cases, there were associated features of poor prognosis though the dual *BRAF*<sup>G466V</sup>+*KRAS*<sup>G12S</sup> mutated tumor has seen disease control recently on 41 cycles of FOLFIRI and bevacizumab, which may argue for varying degrees of relative contribution from each mutation on tumor phenotype. Interestingly, one patient with deactivating *BRAF*<sup>D594G</sup> mutation was refractory to all lines of treatment, including anti-EGFR therapy, and ultimately died of aggressive disease. This is at odds with recent reports suggesting that *BRAF*<sup>D594G</sup> mutation may be an indicator of good prognosis [23]. It is unclear whether this patient's concurrent *MET* amplification may have contributed to his overall poor prognosis and therapeutic resistance.

*ERBB2* (*HER2/neu*) amplifications were found in 5.1% of our mCRC patients with the majority in *KRAS* wild-type tumors (except for 1 with a concurrent

*ERBB2*+*KRAS*<sup>G12D</sup> alteration). Another FoundationOne analysis of >10,000 cases of gastrointestinal malignancies identified *HER2* amplifications and mutations in 3.0% and 4.8%, respectively, of cases from the CRC cohort [24]. Our patients with *HER2* amplified tumors appeared to have shortened clinical benefit with anti-EGFR therapy, which is consistent with the recent phase II HERACLES trial where none of the patients with *HER2* amplified, *RAS/BRAF* wild-type metastatic colorectal tumors had a response to anti-EGFR therapy [25]. Similar to the preponderance of left colon primary tumors in the HERACLES trial, all of our *HER2* amplified tumors were located in the rectosigmoid colon. In short, the identification of *HER2* amplifications in patients with *RAS/BRAF* wild-type metastatic colorectal tumors is of major significance given the clinical benefit derived from dual *HER2*-directed therapy including trastuzumab + lapatinib (HERACLES) or trastuzumab + pertuzumab (MyPathway) [25, 26].

*PIK3CA*, *PTEN*, and *AKT* mutations were identified in 18.1% (25), 10.9% (15), and 2.9% (4) of our mCRC patients, respectively. Many of these patients had metastatic tumors associated with aggressive features. In addition, 75% of *AKT* mutated tumors were located in the right colon, almost half (48.0%) of *PIK3CA* mutated tumors were right-sided colon cancers, and concurrent mutations in RAS-RAF-MAPK or PTEN-PIK3CA-AKT signaling were common. For example, 19 patients (76.0%) with *PIK3CA* mutations also had concurrent *KRAS* mutations while 5 (20.0%) and 1 (4.0%) with *PIK3CA* altered tumors also had concurrent *PTEN* and *AKT1* mutations, respectively. Mutations in mediators of the PTEN-PIK3CA-AKT signaling pathway in CRC have been associated with poorer prognosis and lack of clinical response to anti-EGFR therapy [27, 28]. For *PIK3CA* mutations, in particular, prior studies have demonstrated that exon 9 mutations had no effect while exon 20 mutations were associated with resistance to anti-EGFR therapy [29]. However, this differential effect by exon has not been supported by recent meta-analysis [30]. Given the high rate of concurrent *RAS* mutations seen with *PIK3CA* and related pathway mutations, a definitive association between resistance to EGFR inhibition and

**Table 6: Total number of clinically significant alterations**

| No. of alterations | Frequency (%) | Age                          | Sex                          | Race                                                                       | Primary disease site                                                                                              | MSI                              |
|--------------------|---------------|------------------------------|------------------------------|----------------------------------------------------------------------------|-------------------------------------------------------------------------------------------------------------------|----------------------------------|
| <9                 | 121 (87.7%)   | Median (range)<br>56 (27-84) | F 48 (39.7%)<br>M 73 (60.3%) | White 74 (61.2%)<br>Asian 25 (20.7%)<br>Black 6 (4.9%)<br>Other 16 (13.2%) | Right colon 28 (23.1%)                                                                                            | MSS 121 (100%)                   |
|                    |               |                              |                              |                                                                            | Transverse colon 5 (4.1%)<br>Left colon (includes sigmoid) 60 (49.6%)<br>Rectum 22 (18.2%)<br>Colon, NOS 6 (5.0%) |                                  |
| 9-16               | 14 (10.1%)    | Median (range)<br>60 (39-88) | F 6 (42.9%)<br>M 8 57.1%     | White 8 (57.1%)<br>Asian 4 (28.7%)<br>Black 1 (7.1%)<br>Unknown 1 (7.1%)   | Right colon 6 (42.9%)<br>Left colon (includes sigmoid) 5 (35.7%)<br>Rectum 3 (21.4%)                              | MSS 13 (92.9%)<br>NR 1 (7.1%)    |
| 17-25              | 3 (2.2%)      | Mean 59.7                    | F 2 (66.6%)<br>M 1 (33.3%)   | White 3 (100%)                                                             | Rectum 2 (66.6%)<br>Right colon 1 (33.3%)                                                                         | MSI-H 2 (66.6%)<br>MSS 1 (33.3%) |

MSI: Microsatellite instability; NOS: Not otherwise specified; MSS: Microsatellite stable; NR: Not reported; MSI-H: MSI high.

PTEN-PIK3CA-AKT pathway mutations is difficult to make. Further studies are needed to resolve this issue.

Three patients (2.2%) demonstrated *MET* amplifications associated with poor prognostic features. *MET* amplification and increased c-MET expression have also been associated with an aggressive phenotype and therapeutic resistance, particularly to MEK inhibition, in mCRC [31, 32]. Interestingly, we have observed anti-EGFR refractoriness in 2 of our patients with *MET* amplifications despite the presence of a *RAS*- wild-type phenotype and lack of activating *BRAF* mutations. This is consistent with preclinical data suggesting MET activation as a mechanism of resistance to anti-EGFR therapy [33].

We lastly identified 3 patients (2.2%) with tumors categorized in the highest number of clinically significant alterations group (17-25) that also demonstrated high TMB as per FoundationOne. TMB categories per FoundationOne testing have been validated in melanoma patients treated with PD-1 blockade [34]. Response to PD-1 inhibitors was significantly superior in patients with high TMB (>23.1 mutations/Mb) compared to intermediate or low TMB (3.2-23.1 mutations/Mb and <3.2 mutations/Mb, respectively). Furthermore, a recent phase II study showed that patients with advanced urothelial cancer who responded to the programmed death ligand 1 (PD-L1) inhibitor atezolizumab had a significantly higher TMB (median 12.4 mutations/Mb) than non-responders (median 6.4 mutations/Mb,  $p < 0.0001$ ) [35]. Two patients had MSI-H tumors while 1 hypermutant tumor was MSS and harbored a *POLE* mutation. Interestingly, 42.9% of tumors with 9-16 clinically significant alterations were located in

the right colon while one-third of tumors with 17-25 total alterations were located in the right colon; tumors with <9 number of alterations were predominantly located in the left colon. In the CRC dataset from TCGA, 75% of hypermutated tumors arose from the right colon yet not all of them were MSI-H [5]. Mutations in polymerase  $\epsilon$  or *POLE* were found among 25% of hypermutated tumors in this cohort. Mutations in *POLE* have been shown to contribute to an ultramutated yet MSS phenotype in colorectal tumors [36]. A recent NGS study confirmed that increasing mutational load correlated with MSI yet colorectal tumors with the highest mutational burden that were distinct from MSI tumors all harbored *POLE* mutations [37]. Furthermore, mismatch repair-deficiency or MSI has recently been shown to predict clinical benefit to immune checkpoint blockade with anti-PD-1 therapy in mCRC [38]. The characterization of mutational load in CRC may serve as a better indicator than MSI status in determining a hypermutant profile that could predict benefit from immunotherapy. Our findings are hypothesis generating and offer support to consider molecular analysis of tumors to determine the total number of alterations as a potential correlate to MSI and candidacy for anti-PD-1 therapy in mCRC.

Future studies of larger size and, ideally, prospective design will be helpful in corroborating associations between molecular alterations of interest described in our study and prognosis, resistance to EGFR inhibition, and/or ability to be targeted for therapy in mCRC. Comparative genomic analyses have identified a high level of concordance particularly for *RAS*, *BRAF*, and *PIK3CA*

mutations between colorectal primary and metastatic tumors [39, 40]. However, other molecular alterations may differ based on the site of tumor and/or exposure to chemotherapy [41–44]. Although such mixed results are likely dependent on the specific mutation that is profiled, other factors including specimen integrity and sampling method may also contribute to heterogeneity. Indeed, further analyses are needed to describe the concordance or discordance of other mutations across tumor sites and treatment effects in mCRC, and careful consideration in design will be needed in order to account for confounding factors as described above.

In conclusion, comprehensive genomic profiling can uncover gene alterations beyond conventional *RAS* or *RAF* mutant subtypes that predict resistance to anti-EGFR therapy and in identifying potential therapeutic targets outside of NCCN standard treatments in mCRC. *ERBB2* amplified tumors commonly originate from the rectosigmoid colon, are predominantly *RAS/BRAF* wild-type, and may predict benefit to HER2-directed therapy. Hypermutant tumors or tumors with *POLE* mutations may predict benefit to anti-PD-1 therapy. Our findings are hypothesis generating and warrant further investigation in larger datasets and in prospective settings.

## MATERIALS AND METHODS

### Study patients and tumor samples

Patients with advanced or metastatic (stage IV) colorectal cancer treated at the Gastrointestinal Medical Oncology Clinic at City of Hope National Medical Center (Duarte, CA) between April 2013 and February 2016 were screened for this study. Eligibility criteria was limited to those who underwent expanded genomic tumor analysis by FoundationOne. There were no exclusions to tumor histology, medical comorbidities, previous treatment or lines of prior therapy, or performance status. Comprehensive genomic profiling was conducted through NGS via FoundationOne (Foundation Medicine, Inc., Cambridge, MA) with reports generated from April 2013 to February 2016. The study was approved by the Institutional Review Board (IRB).

### Next-generation sequencing

Comprehensive genomic analysis was conducted on tumor samples (formalin-fixed paraffin-embedded) retrieved from surgical resection, core needle biopsies, or excisional biopsies and delivered to Foundation Medicine, Inc. The NGS assay performed by FoundationOne has been previously described and validated [45]. The initial whole-genome shotgun library construction and hybridization-based capture of 4,557 exons from 287 cancer-related genes and 47 introns from 19 genes with frequent DNA rearrangements has since been expanded

to identify genetic alterations across the coding regions of 315 cancer-related genes and introns from 28 genes commonly rearranged in solid cancers.

### Study design

Retrospective analysis of genetic mutations, amplifications, or alterations present in our cohort of 138 patients with mCRC was performed through test results provided in an integrative report available via FoundationICE (Interactive Cancer Explorer). Patient demographics including age, sex, ethnicity, site of primary, stage at diagnosis, and number of previous treatments were obtained from chart abstraction of each patient's electronic medical record (EMR). Microsatellite instability classified as stable (MSS), low (MSI-L), or high (MSI-H) were abstracted from pathology reports and response to anti-EGFR therapy, when available, was described according to Response Evaluation Criteria in Solid Tumors (RECIST) criteria and obtained from medical records [46]. The total number of clinically significant alterations for each patient was determined by tallying the sum of alterations included in the panel of clinically significant variants provided by FoundationICE reports and arbitrarily categorized into 3 groups (<9, 9-16, and > 16 total number of alterations). We defined hypermutant tumors as those in the highest number of mutations group that were also found to have high TMB as validated by FoundationOne (high >23.1 mutations/MB, intermediate 3.2-23.1 mutations/MB, and low <3.2 mutations/MB) [34].

### Statistical analyses

All statistical analyses performed were descriptive and no formal statistical hypotheses were assessed. The sample size was determined by the total number of mCRC patients with FoundationOne results available. All descriptive statistics were conducted in Excel with associated formulas and functions.

## CONFLICTS OF INTEREST

All authors declare no potential conflicts of interest.

## GRANT SUPPORT

The research described was supported by the City of Hope Cancer Center Support Grant (CCSG) and CCSG-supported Core Facilities.

## REFERENCES

1. Siegel RL, Miller KD, Jemal A. Cancer statistics, 2016. *CA Cancer J Clin.* 2016; 66:7-30.
2. Fakih MG. Metastatic colorectal cancer: current state and future directions. *J Clin Oncol.* 2015; 33:1809-1824.

3. Clark CR, Starr TK. Mouse models for the discovery of colorectal cancer driven genes. *World J Gastroenterol.* 2016; 22:815-822.
4. Fearon ER. Molecular genetics of colorectal cancer. *Annu Rev Pathol.* 2011; 6:479-507.
5. Cancer Genome Atlas Network. Comprehensive molecular characterization of human colon and rectal cancer. *Nature.* 2012; 487:330-337.
6. Amado RG, Wolf M, Peeters M, Van Cutsem E, Siena S, Freeman DJ, Juan T, Sikorski R, Suggs S, Radinsky R, Patterson SD, Chang DD. Wild-type KRAS is required for panitumumab efficacy in patients with metastatic colorectal cancer. *J Clin Oncol.* 2008; 26:1626-1634.
7. Karapetis CS, Khambata-Ford S, Jonker DJ, O'Callaghan CJ, Tu D, Tebbutt NC, Simes RJ, Chalchal H, Shapiro JD, Robitaille S, Price TJ, Shepherd L, Au HJ, et al. K-ras mutations and benefit from cetuximab in advanced colorectal cancer. *N Engl J Med.* 2008; 359:1757-1765.
8. Douillard JY, Oliner KS, Siena S, Tabernero J, Burkes R, Barugel M, Humblet Y, Bodoky G, Cunningham D, Jassem J, Rivera F, Kocákova I, Ruff P, et al. Panitumumab-FOLFOX4 treatment and RAS mutations in colorectal cancer. *N Engl J Med.* 2013; 369:1023-1034.
9. Van Cutsem E, Lenz HJ, Köhne CH, Heinemann V, Tejpar S, Melezínek I, Beier F, Stroh C, Rougier P, van Krieken JH, Ciardiello F. Fluorouracil, leucovorin, and irinotecan plus cetuximab treatment and RAS mutations in colorectal cancer. *J Clin Oncol.* 2015; 33:692-700.
10. Sorich MJ, Wiese MD, Rowland A, Kichenadasse G, McKinnon RA, Karapetis CS. Extended RAS mutations and anti-EGFR monoclonal antibody survival benefit in metastatic colorectal cancer: a meta-analysis of randomized, controlled trials. *Ann Oncol.* 2015; 26:13-21.
11. Valtorta E, Misale S, Sartore-Bianchi A, Nagtegaal ID, Paraf F, Lauricella C, Dimartino V, Hobor S, Jacobs B, Ercolani C, Lamba S, Scala E, Veronese S, et al. KRAS gene amplification in colorectal cancer and impact on response to EGFR-targeted therapy. *Int J Cancer.* 2013; 133:1259-1265.
12. Di Nicolantonio F, Martini M, Molinari F, Sartore-Bianchi A, Arena S, Saletti P, De Dosso S, Mazzucchelli L, Frattini M, Siena S, Bardelli A. Wild-type BRAF is required for response to panitumumab or cetuximab in metastatic colorectal cancer. *J Clin Oncol.* 2008; 26:5705-5712.
13. Van Cutsem E, Köhne CH, Láng I, Folprecht G, Nowacki MP, Cascinu S, Shchepotin I, Maurel J, Cunningham D, Tejpar S, Schlichting M, Zubel A, Celik I, et al. Cetuximab plus irinotecan, fluorouracil, and leucovorin as first-line treatment for metastatic colorectal cancer: updated analysis of overall survival according to tumor KRAS and BRAF mutation status. *J Clin Oncol.* 2011; 29:2011-2019.
14. Tveit KM, Guren T, Glimelius B, Pfeiffer P, Sorbye H, Pyrhonen S, Sigurdsson F, Kure E, Ikdahl T, Skovlund E, Fokstuen T, Hansen F, Hofslie E, et al. Phase III trial of cetuximab with continuous or intermittent fluorouracil, leucovorin, and oxaliplatin (Nordic FLOX) versus FLOX alone in first-line treatment of metastatic colorectal cancer: the NORDIC-VII study. *J Clin Oncol.* 2012; 30:1755-1762.
15. Seymour MT, Brown SR, Middleton G, Maughan T, Richman S, Gwyther S, Lowe C, Seligmann JF, Wadsley J, Maisey N, Chau I, Hill M, Dawson L, et al. Panitumumab and irinotecan versus irinotecan alone for patients with KRAS wild-type, fluorouracil-resistant advanced colorectal cancer (PICCOLO): a prospectively stratified randomised trial. *Lancet Oncol.* 2013; 14:749-759.
16. Dahlman KB, Xia J, Hutchinson K, Ng C, Hucks D, Jia P, Atefi M, Su Z, Branch S, Lyle PL, Hicks DJ, Bozon V, Glaspy JA, et al. BRAF (L597) mutations in melanoma are associated with sensitivity to MEK inhibitors. *Cancer Discov.* 2012; 2:791-797.
17. Imielinski M, Greulich H, Kaplan B, Araujo L, Amann J, Horn L, Schiller J, Villalona-Calero MA, Meyerson M, Carbone DP. Oncogenic and sorafenib-sensitive ARAF mutations in lung adenocarcinoma. *J Clin Invest.* 2014; 124:1582-1586.
18. Diamond EL, Durham BH, Haroche J, Yao Z, Ma J, Parikh SA, Wang Z, Choi J, Kim E, Cohen-Aubart F, Lee SC, Gao Y, Micol JB, et al. Diverse and targetable kinase alterations drive histiocytic neoplasms. *Cancer Discov.* 2016; 6:154-165.
19. Kaczirek K, Ciuleanu TE, Vrbanec D, Marton E, Messinger D, Liegl-Atzwanger B, Wrba F, Knittelfelder R, Lindner E, Zielinski CC, Streubel B, Brodowicz T. FOLFOX4 plus cetuximab for patients with previously untreated metastatic colorectal cancer according to tumor RAS and BRAF mutation status: updated analysis of the CECOG/CORE 1.2.002 study. *Clin Colorectal Cancer.* 2015; 14:91-98.
20. Houben R, Becker JC, Kappel A, Terheyden P, Bröcker EB, Goetz R, Rapp UR. Constitutive activation of the Ras-Raf signaling pathway in metastatic melanoma is associated with poor prognosis. *J Carcinog.* 2004; 3:6.
21. Smalley KS, Xiao M, Villanueva J, Nguyen TK, Flaherty KT, Letrero R, Van Belle P, Elder DE, Wang Y, Nathanson KL, Herlyn M. CRAF inhibition induces apoptosis in melanoma cells with non-V600E BRAF mutations. *Oncogene.* 2009; 28:85-94.
22. Heidorn SJ, Milagre C, Whittaker S, Nourry A, Niculescu-Duvas I, Dhomen N, Hussain J, Reis-Filho JS, Springer CJ, Pritchard C, Marais R. Kinase-dead BRAF and oncogenic RAS cooperate to drive tumor progression through CRAF. *Cell.* 2010; 140:209-221.
23. Cremolini C, Di Bartolomeo M, Amatu A, Antoniotti C, Moretto R, Berenato R, Perrone F, Tamborini E, Aprile G, Lonardi S, Sartore-Bianchi A, Fontanini G, Milione

- M, et al. BRAF codons 594 and 596 mutations identify a new molecular subtype of metastatic colorectal cancer at favorable prognosis. *Ann Oncol.* 2015; 26:2092-2097.
24. Bose R, Ali S, Jain N, Gowen K, Bertotti A, Murray E, Ross JS, Beattie MS, Hurwitz H, Hainsworth JD. Frequency of HER2 mutations and amplification in GI malignancies and ability of pertuzumab to overcome neuregulin1 mediated drug resistance to a HER2 tyrosine kinase inhibitor in colon cancer. *J Clin Oncol.* 2016; 34:Abstr 630.
  25. Sartore-Bianchi A, Trusolino L, Martino C, Bencardino K, Lonardi S, Bergamo F, Zaganel V, Leone F, Depetris I, Martinelli E, Troiani T, Ciardiello F, Racca P, et al. Dual-targeted therapy with trastuzumab and lapatinib in treatment-refractory, KRAS codon 12/13 wild-type, HER2-positive metastatic colorectal cancer (HERACLES): a proof-of-concept, multicentre, open-label, phase 2 trial. *Lancet Oncol.* 2016; 17:738-46. doi: 10.1016/S1470-2045(1016)00150-00159.
  26. Hurwitz H, Hainsworth JD, Swanton C, Perez EA, Sweeney C, Burris HA, Spigel D, Meric-Bernstam F, Strickland DK, Leon L, Brammer M, Beattie MS, Bose R. Targeted therapy for gastrointestinal (GI) tumors based on molecular profiles: early results from MyPathway, an open-label phase IIa basket study in patients with advanced solid tumors. *J Clin Oncol.* 2016; 34:Abstr 653.
  27. De Roock W, De Vriendt V, Normanno N, Ciardiello F, Tejpar S. KRAS, BRAF, PIK3CA, and PTEN mutations: implications for targeted therapies in metastatic colorectal cancer. *Lancet Oncol.* 2011; 12:594-603.
  28. Ogino S, Nosho K, Kirkner GJ, Shima K, Irahara N, Kure S, Chan AT, Engelman JA, Kraft P, Cantley LC, Giovannucci EL, Fuchs CS. PIK3CA mutation is associated with poor prognosis among patients with curatively resected colon cancer. *J Clin Oncol.* 2009; 27:1477-1484.
  29. De Roock W, Claes B, Bernasconi D, De Schutter J, Biesmans B, Fountzilias G, Kalogeras KT, Kotoula V, Papamichael D, Laurent-Puig P, Penault-Llorca F, Rougier P, Vincenzi B, et al. Effects of KRAS, BRAF, NRAS, and PIK3CA mutations on the efficacy of cetuximab plus chemotherapy in chemotherapy-refractory metastatic colorectal cancer: a retrospective consortium analysis. *Lancet Oncol.* 2010; 11:753-762.
  30. Therkildsen C, Bergmann TK, Henrichsen-Schnack T, Ladelund S, Nilbert M. The predictive value of KRAS, NRAS, BRAF, PIK3CA and PTEN for anti-EGFR treatment in metastatic colorectal cancer: a systematic review and meta-analysis. *Acta Oncol.* 2014; 53:852-864.
  31. Bradley CA, Dunne P, McArt D, Arthur K, McQuaid S, Salto-Tellez M, Johnston P, Van Schaeybroeck S. The role of c-MET/HGF signaling as a critical mediator of an invasive and resistant phenotype in colorectal cancer. *Cancer Res.* 2015; 75:4018.
  32. Zeng ZS, Weiser MR, Kuntz E, Chen CT, Khan SA, Forslund A, Nash GM, Gimbel M, Yamaguchi Y, Culliford AT, D'Alessio M, Barany F, Paty PB. c-Met gene amplification is associated with advanced stage colorectal cancer and liver metastases. *Cancer Lett.* 2008; 265:258-269.
  33. Bardelli A, Corso S, Bertotti A, Hobor S, Valtorta E, Siravegna G, Sartore-Bianchi A, Scala E, Cassingena A, Zecchin D, Apicella M, Migliardi G, Galimi F, et al. Amplification of the MET receptor drives resistance to anti-EGFR therapies in colorectal cancer. *Cancer Discov.* 2013; 3:658-673.
  34. Johnson DB, Frampton GM, Rioth MJ, Yusko E, Ennis R, Fabrizio D, Greenbowe JR, Ali SM, Frederick DT, Puzanov I, Balko JM, Cates J, Ross JS, et al. Hybrid capture-based next-generation sequencing (HC NGS) in melanoma to identify markers of response to anti-PD-1/PD-L1. *J Clin Oncol.* 2016; 34:Abstr 105.
  35. Rosenberg JE, Hoffman-Censits J, Powles T, van der Heijden MS, Balar AV, Necchi A, Dawson N, O'Donnell PH, Balmanoukian A, Loriot Y, Srinivas S, Retz MM, Grivas P, et al. Atezolizumab in patients with locally advanced and metastatic urothelial carcinoma who have progressed following treatment with platinum-based chemotherapy: a single-arm, multicentre, phase 2 trial. *Lancet.* 2016; 387:1909-1920.
  36. Briggs S, Tomlinson I. Germline and somatic polymerase  $\epsilon$  and  $\delta$  mutations define a new class of hypermutated colorectal and endometrial cancers. *J Pathol.* 2013; 230:148-153.
  37. Stadler ZK, Battaglin F, Middha S, Hechtman JF, Tran C, Cercek A, Yaeger R, Segal NH, Varghese AM, Reidy-Lagunes DL, Kemeny NE, Salo-Mullen EE, Ashraf A, et al. Reliable detection of mismatch repair deficiency in colorectal cancers using mutational load in next-generation sequencing panels. 2016; 34:2141-2147. doi: 10.1200/JCO.2015.1265.1067.
  38. Le DT, Uram JN, Wang H, Bartlett BR, Kemberling H, Eyring AD, Skora AD, Luber BS, Azad NS, Laheru D, Biedrzycki B, Donehower RC, Zaheer A, et al. PD-1 blockade in tumors with mismatch-repair deficiency. *N Engl J Med.* 2015; 372:2509-2520.
  39. Brannon AR, Vakiani E, Sylvester BE, Scott SN, McDermott G, Shah RH, Kania K, Viale A, Oschwald DM, Vacic V, Emde AK, Cercek A, Yaeger R, et al. Comparative sequencing analysis reveals high genomic concordance between matched primary and metastatic colorectal cancer lesions. *Genome Biol.* 2014; 15:454.
  40. Vakiani E, Janakiraman M, Shen R, Sinha R, Zeng Z, Shia J, Cercek A, Kemeny N, D'Angelica M, Viale A, Heguy A, Paty P, Chan TA, et al. Comparative genomic analysis of primary versus metastatic colorectal carcinomas. *J Clin Oncol.* 2012; 30:2956-2962.
  41. Alagaratnam S, Brunsell TH, Danielsen SA, Sveen A, Eknæs M, Hektoen M, Røsok B, Bjørneth BA, Nesbakken A, Lothe R. Heterogeneity of colorectal cancers and

- multiple liver metastases by mutation and copy number profiling. *Cancer Res.* 2016; 76:Abstr 2396.
42. Kogita A, Yoshioka Y, Sakai K, Togashi Y, Sogabe S, Nakai T, Okuno K, Nishio K. Inter- and intra-tumor profiling of multi-regional colon cancer and metastasis. *Biochem Biophys Res Commun.* 2015; 458:52-56.
  43. Lee SY, Haq F, Kim D, Jun C, Jo HJ, Ahn SM, Lee WS. Comparative genomic analysis of primary and synchronous metastatic colorectal cancers. *PLoS One.* 2014; 9:e90459.
  44. Sveen A, Løes IM, Alagaratnam S, Nilsen G, Høland M, Lingjærde OC, Sorbye H, Berg KC, Horn A, Angelsen JH, Knappskog S, Lønning PE, Lothe RA. Intra-patient inter-metastatic genetic heterogeneity in colorectal cancer as a key determinant of survival after curative liver resection. *PLoS Genet.* 2016; 12:e1006225.
  45. Frampton GM, Fichtenholtz A, Otto GA, Wang K, Downing SR, He J, Schnall-Levin M, White J, Sanford EM, An P, Sun J, Juhn F, Brennan K, et al. Development and validation of a clinical cancer genomic profiling test based on massively parallel DNA sequencing. *Nat Biotechnol.* 2013; 31:1023-1031.
  46. Therasse P, Arbuck SG, Eisenhauer EA, Wanders J, Kaplan RS, Rubinstein L, Verweij J, Van Glabbeke M, van Oosterom AT, Christian MC, Gwyther SG. New guidelines to evaluate the response to treatment in solid tumors. European Organization for Research and Treatment of Cancer, National Cancer Institute of the United States, National Cancer Institute of Canada. *J Natl Cancer Inst.* 2000; 92:205-216.
